# Supplementary material for: Satellite and In Situ Sampling Mismatches: Consequences for the Estimation of Satellite Sea Surface Salinity Uncertainties
Source: MDPI journal article supplement (doi:10.3390/rs14081878), 2022-04-13

## Supplementary material for:

### *Satellite and in situ sampling mismatches: consequences for the estimate of satellite sea surface salinity uncertainties.*

This supplementary materials document accompanies the above-referenced article. We include, for completeness, a number of figures that were left out of the main manuscript.

Figure 1: Monthly GLORYS SSS SFV, 15/02/2017

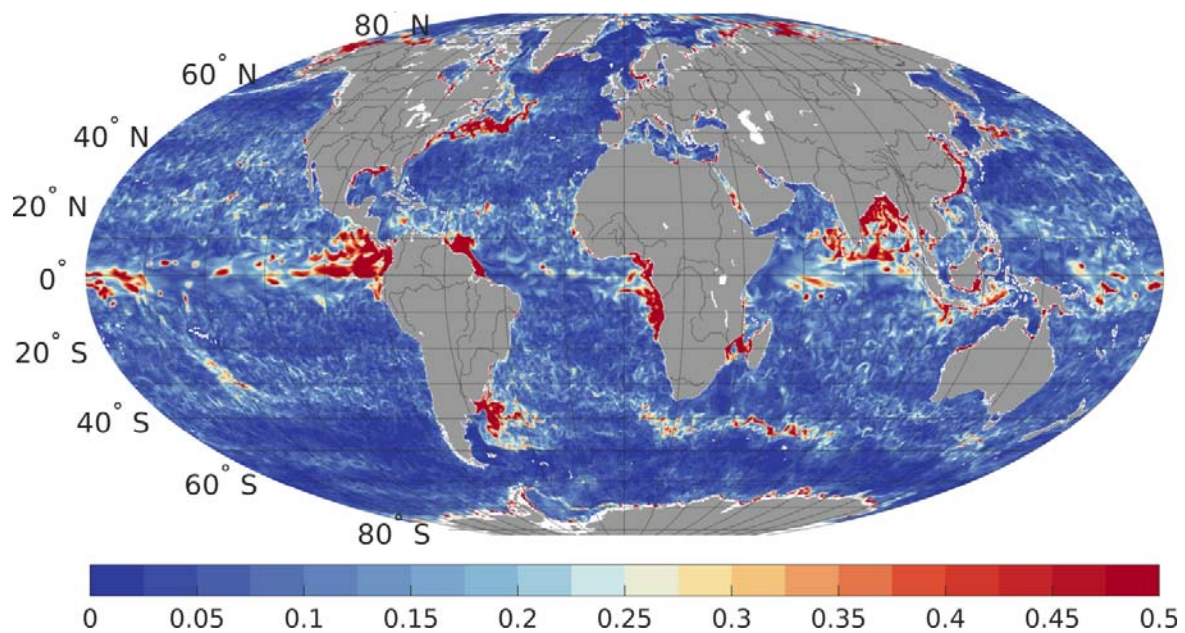

Table 1: Median SSS SFV, computed from GLORYS for a 50 km footprint for the all the months of the year, for comparison with Bingham 2021 results. Unitless color scale, with the colors scaling with the base 10 logarithm of the SFV. The month is given at the top of each panel.

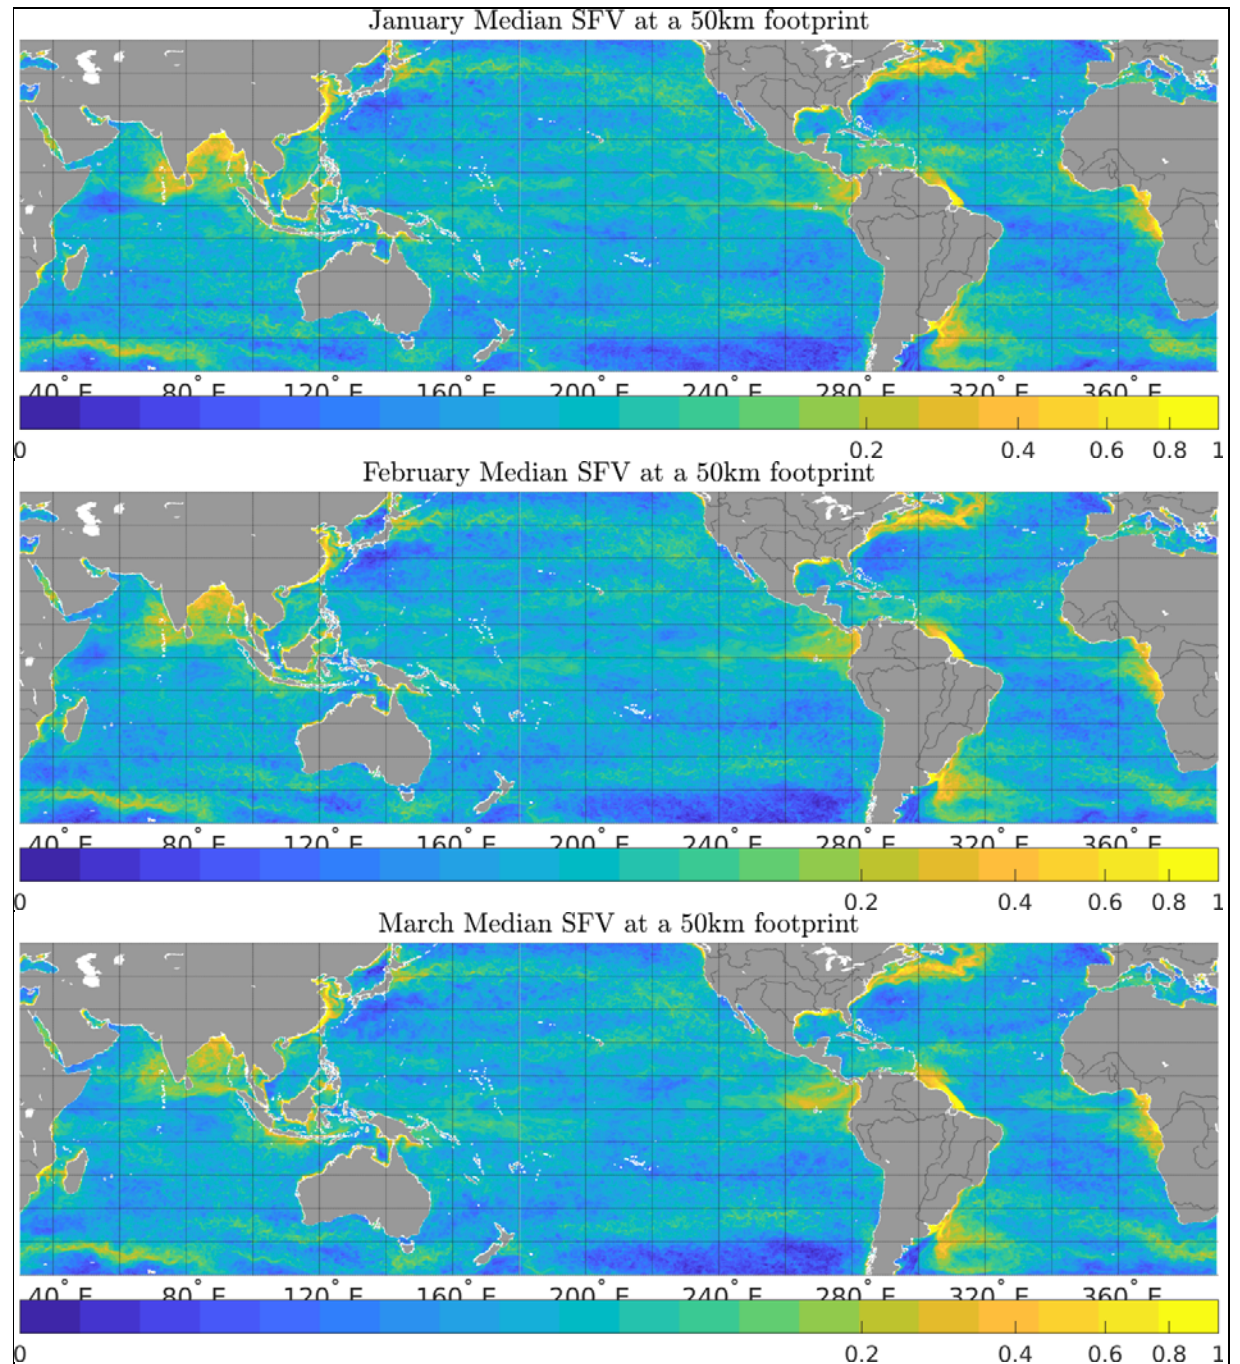

April Median SFV at a 50km footprint

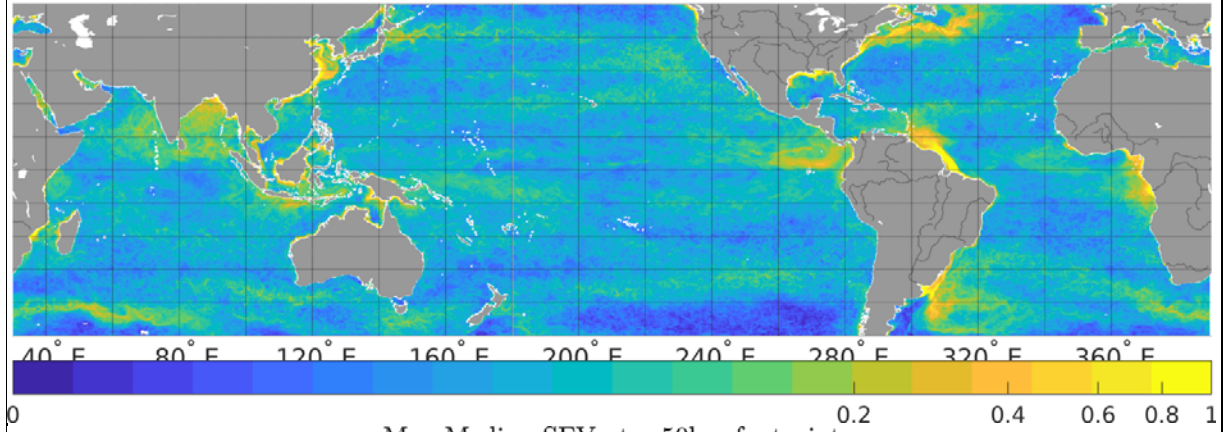

May Median SFV at a 50km footprint

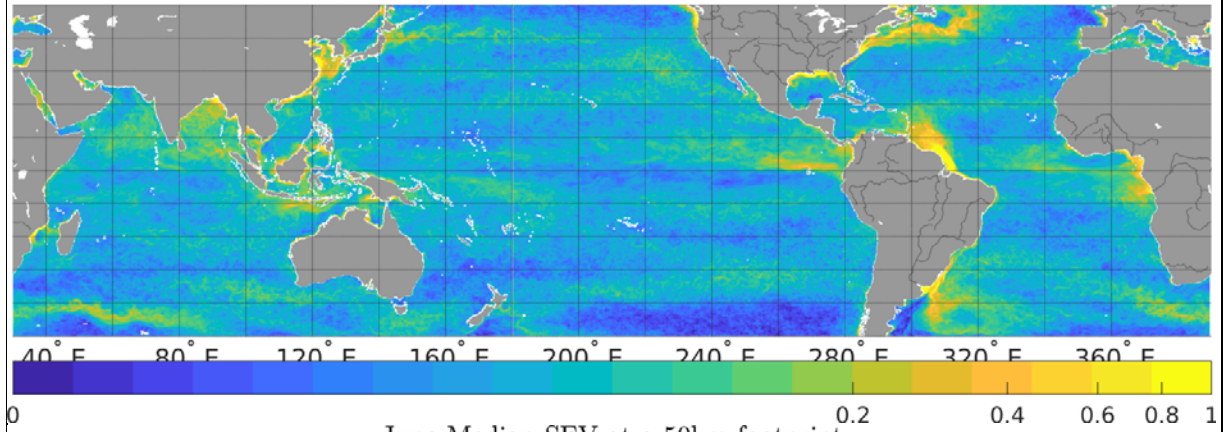

June Median SFV at a 50km footprint

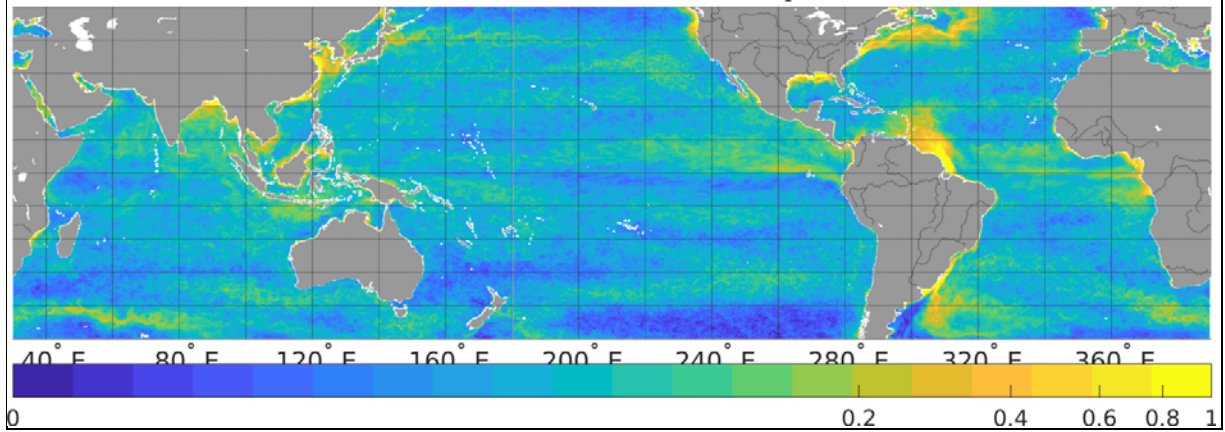

July Median SFV at a 50km footprint

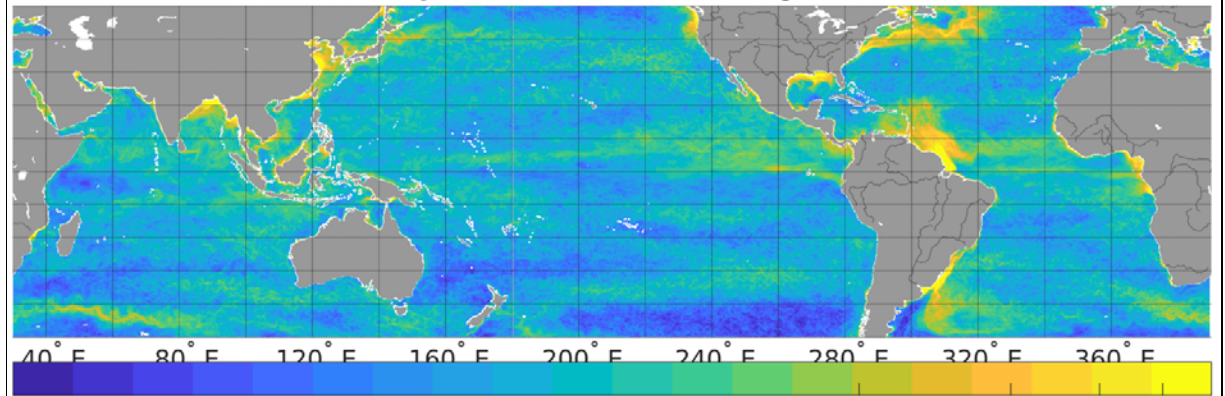

0 0.2 0.4 0.6 0.8 1

August Median SFV at a 50km footprint

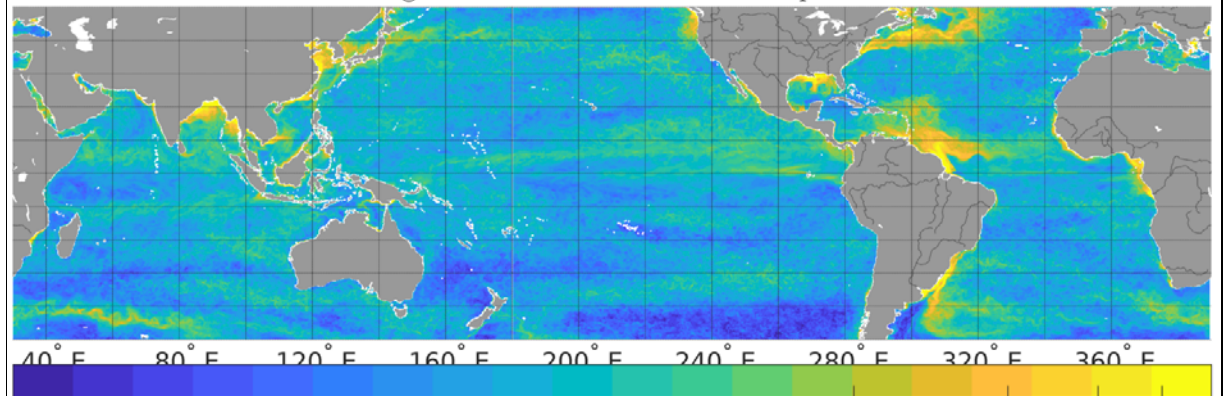

0 0.2 0.4 0.6 0.8 1

September Median SFV at a 50km footprint

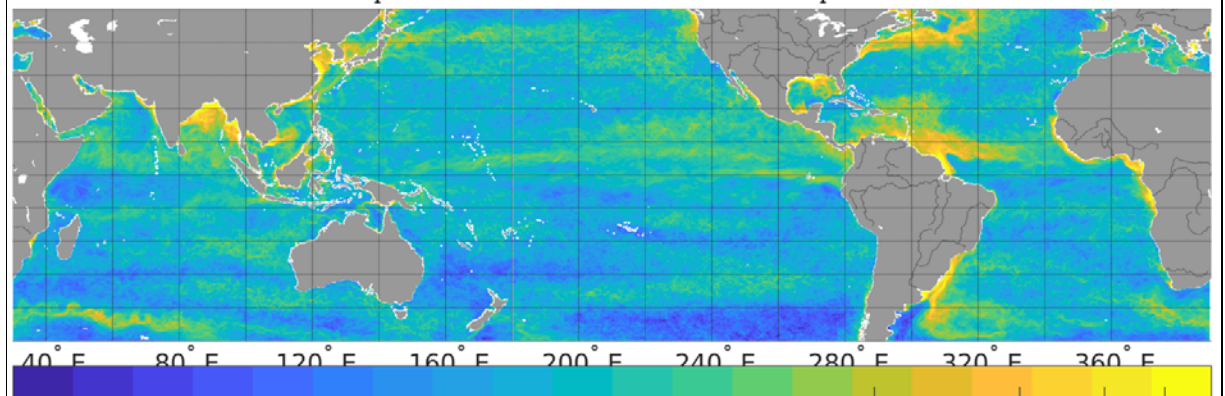

0 0.2 0.4 0.6 0.8 1

October Median SFV at a 50km footprint

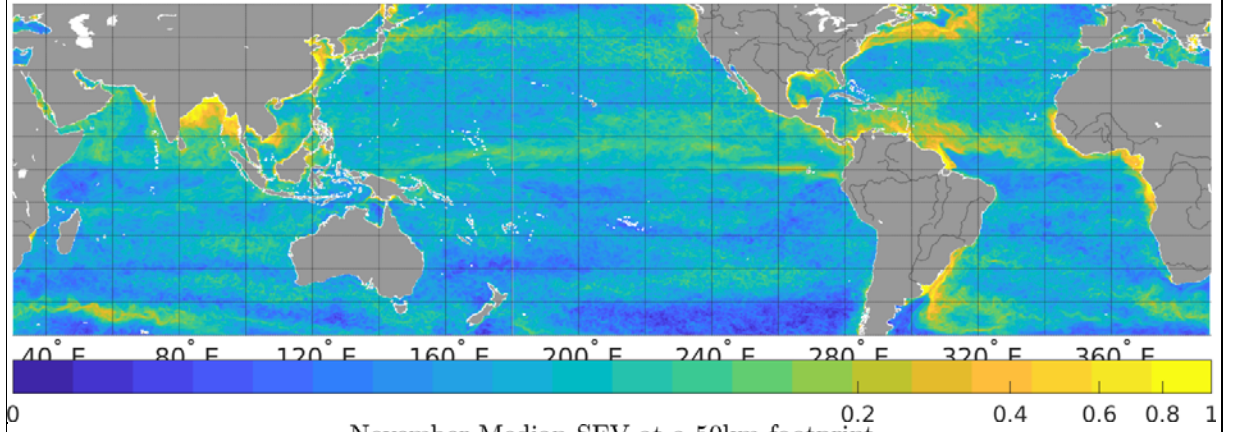

November Median SFV at a 50km footprint

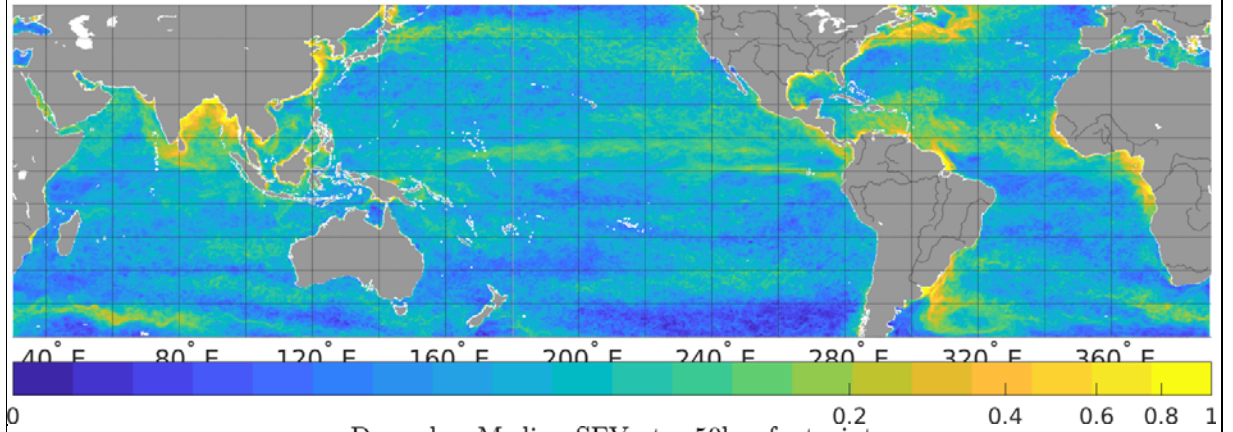

December Median SFV at a 50km footprint

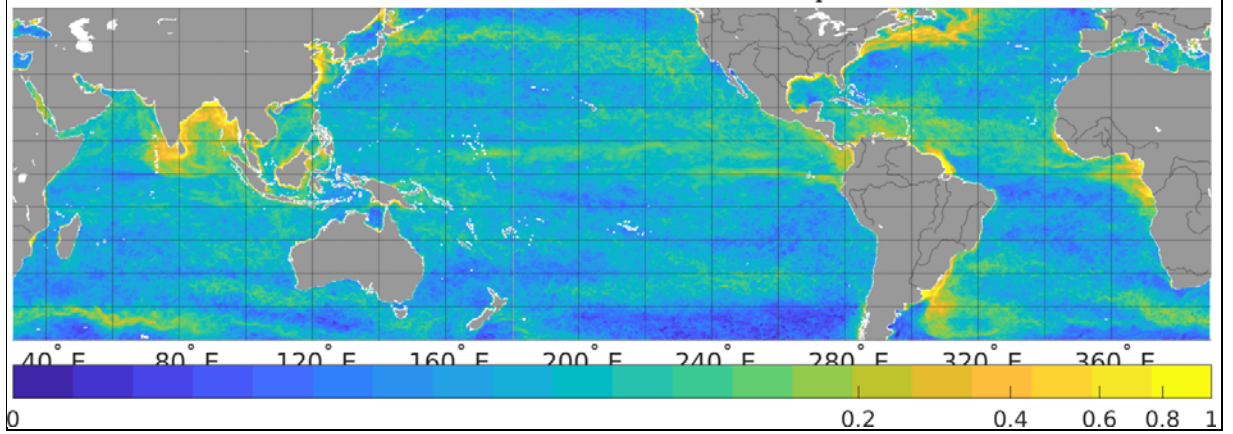

Figure 2: Same as Figure 4 and 5 of main paper, for CCI v3.2 monthly products.

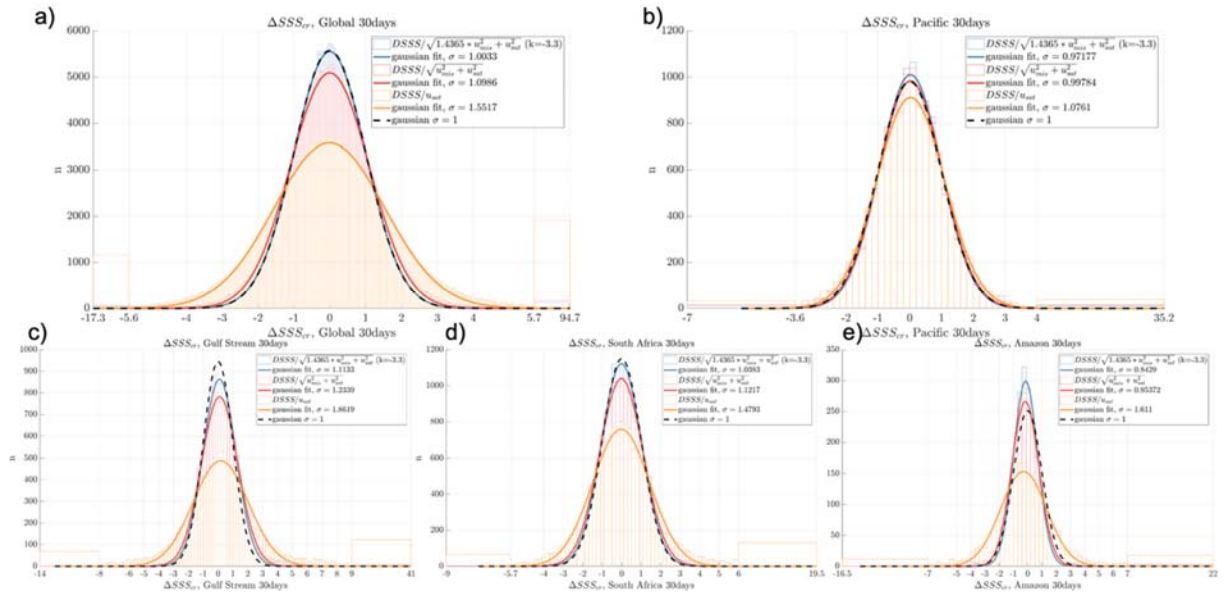

Figure 3: Same as Figure 4 and 5 of main paper, for CCI v2.3 weekly products.

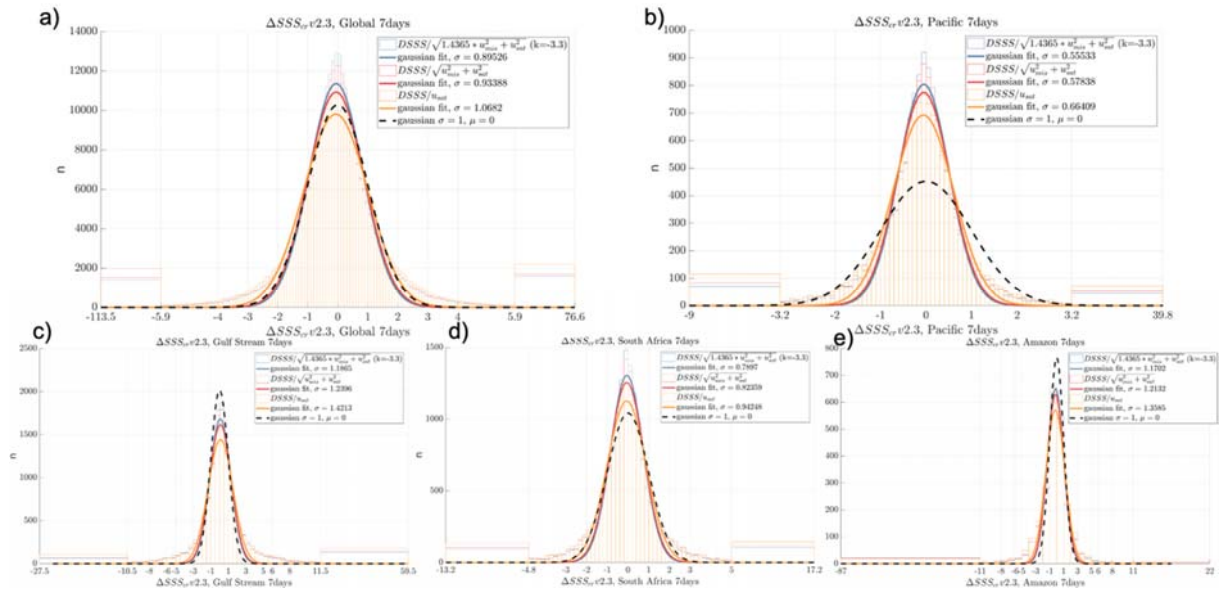

Figure 4: Same as Figure 4 and 5 of main paper, for CCI v2.3 monthly products.

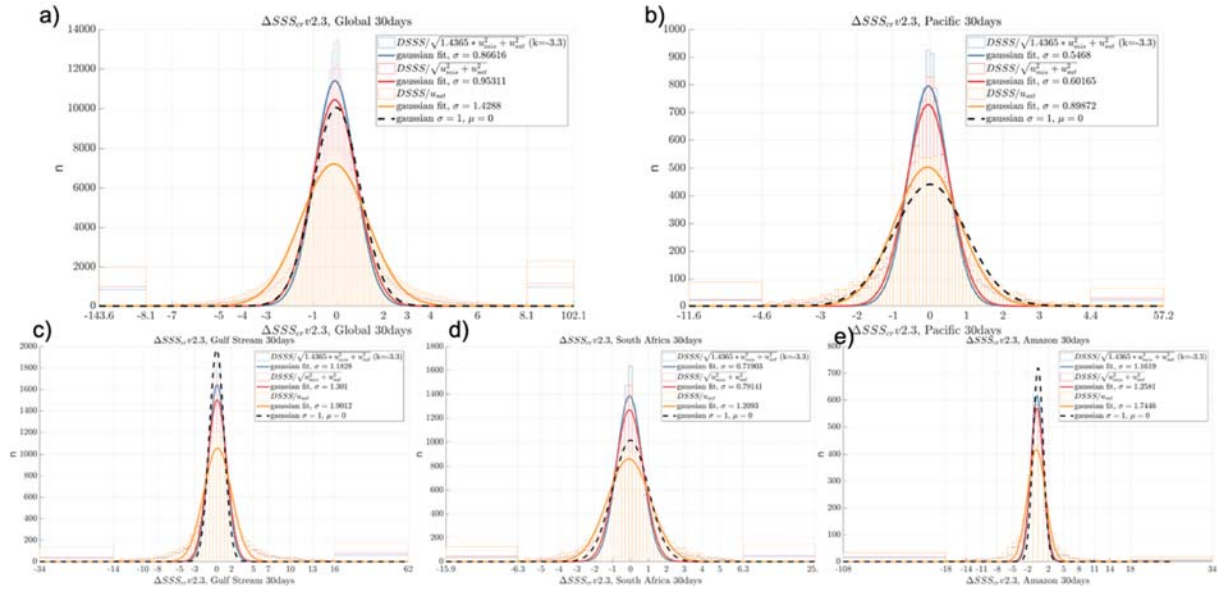

Figure 5: Same as Figures 6 and 7 of main paper, for CCI v3.2 monthly products.

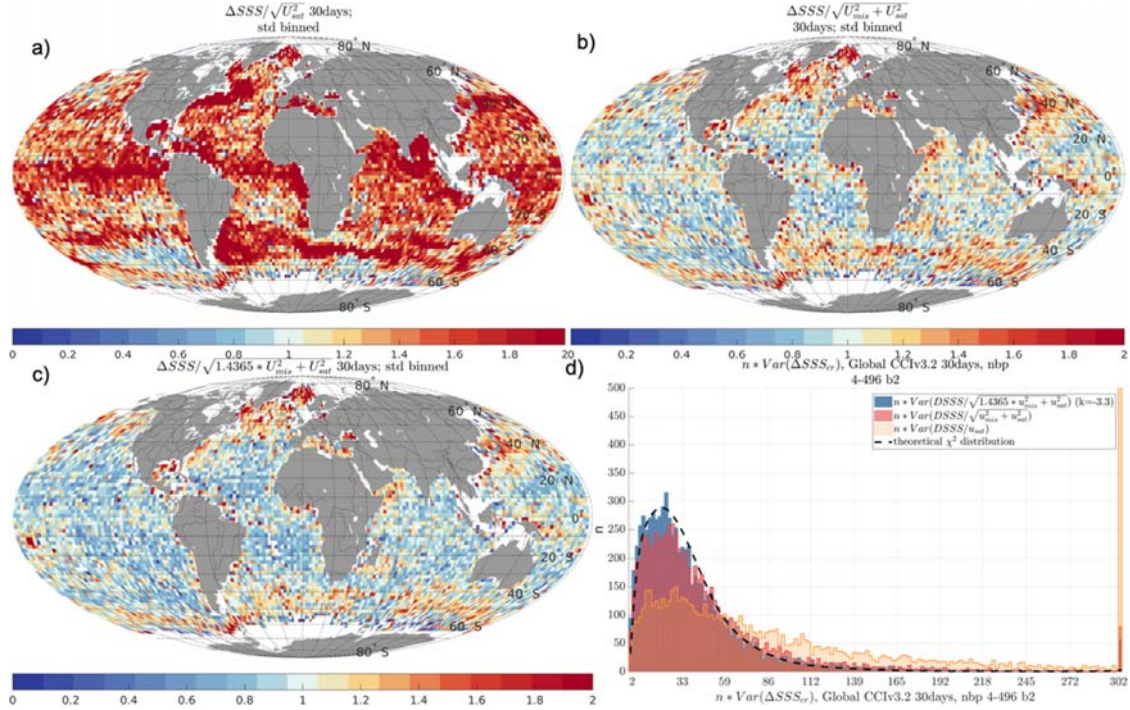

Figure 6: Same as Figures 6 and 7 of main paper, for CCI v2.3 weekly products.

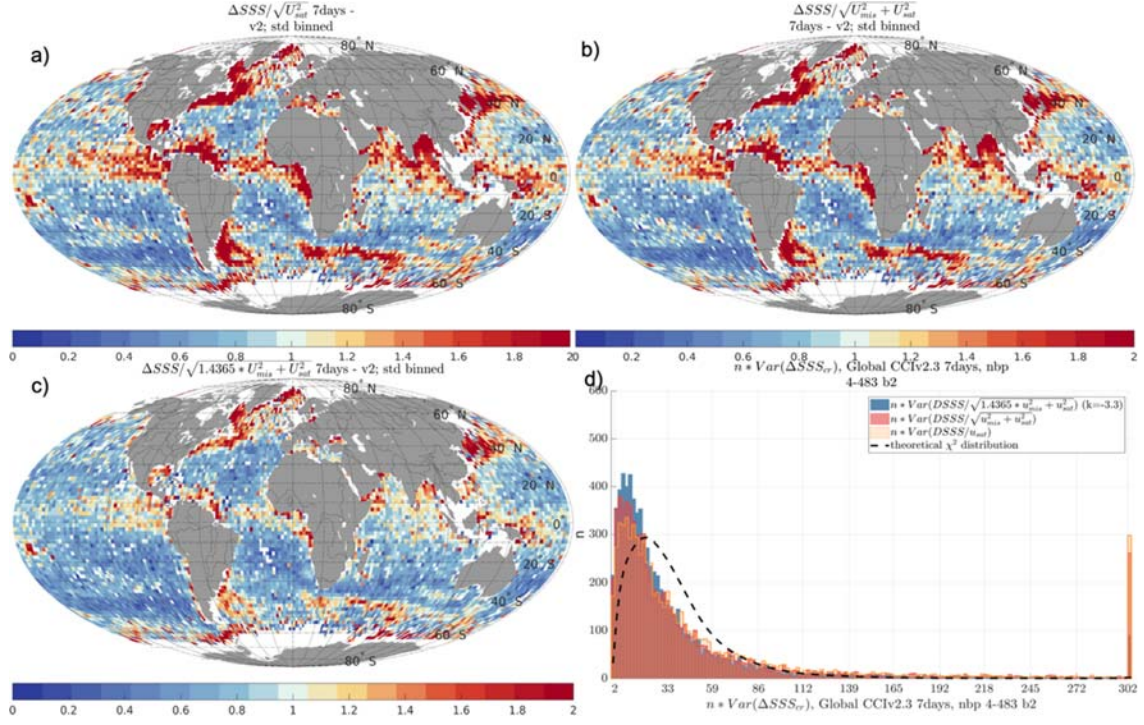

Figure 7: Same as Figures 6 and 7 of main paper, for CCI v2.3 monthly products.

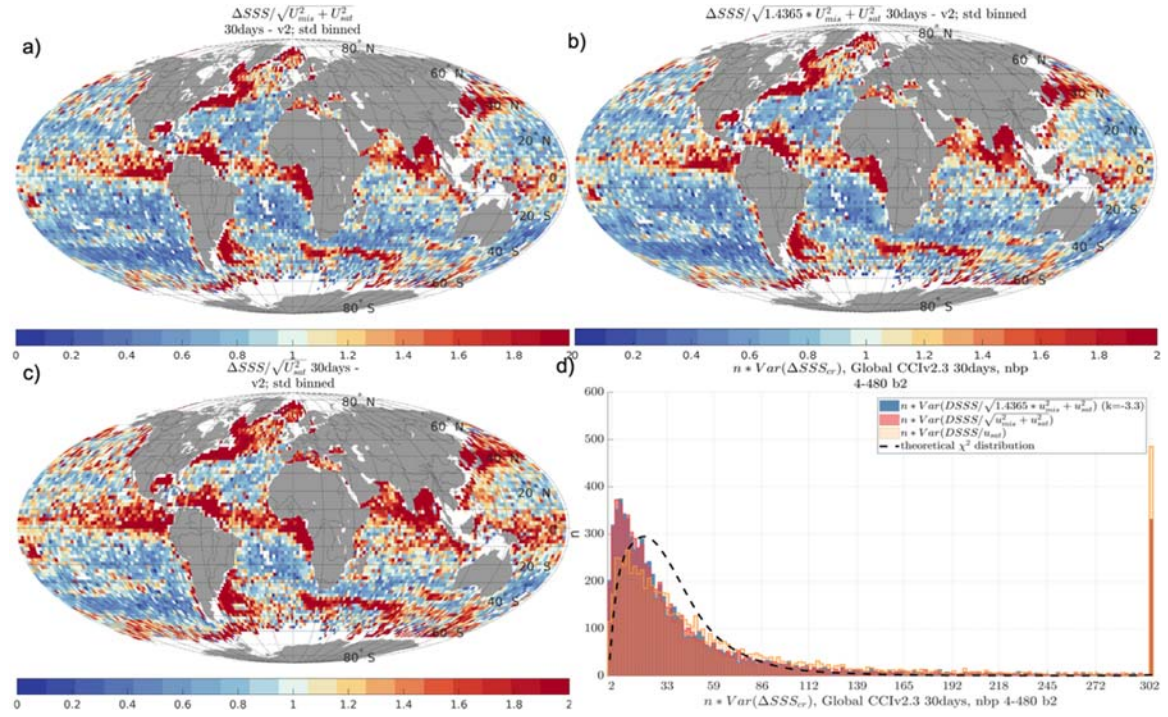

Supplement: s1 [file s1]
